# Supplementary material for: Successful knock-in of Hypertrophic Cardiomyopathy-mutation R723G into the MYH7 gene mimics HCM pathology in pigs
Source: PubMed Central journal article supplement (PMC5859159; doi:10.1038/s41598-018-22936-z), 2018-03-19
Supplement: 41598_2018_22936_MOESM1_ESM.pdf [file 41598_2018_22936_MOESM1_ESM.pdf]

**Successful *knock-in* of Hypertrophic Cardiomyopathy-mutation R723G into the *MYH7*  
gene mimics HCM pathology in pigs**

Montag J, Petersen B, Flögel AK, Becker E, Lucas-Hahn A, Cost GJ, Mühlfeld C, Kraft T, Niemann H,  
Brenner B

**SUPPLEMENTARY MATERIAL**

## Supplementary Tables

**Table S1: Pathological phenotype of genome edited piglets**

|                            | <b>p10</b>                                                                     | <b>p11</b>                                   | <b>p12</b>                     | <b>p13</b>                                                           | <b>Potential cause</b>                                                               |
|----------------------------|--------------------------------------------------------------------------------|----------------------------------------------|--------------------------------|----------------------------------------------------------------------|--------------------------------------------------------------------------------------|
| <b>death</b>               | perinatal                                                                      | postnatal                                    | perinatal                      | postnatal                                                            |                                                                                      |
| <b>Body weight</b>         | 1.18 kg                                                                        | 1.12 kg                                      | 0.93 kg                        | 0.66 kg                                                              |                                                                                      |
| <b>Limbs</b>               | myositis**,<br>muscle<br>degeneration,<br>muscle fiber<br>caliber<br>variation | caliber<br>variation                         | No data                        | No data                                                              | <i>MYH7</i> mutation <sup>1</sup>                                                    |
| <b>tongue</b>              | inflammation,<br>central muscle<br>degeneration                                | No data                                      | edema,<br>caliber<br>variation | edema                                                                | <i>MYH7</i> mutation <sup>1</sup>                                                    |
| <b>Lung</b>                | hyperemia<br>dyselectase                                                       | partial<br>dyselectase,<br>alveolar<br>edema | atelectase                     | dyselectase,<br>intraalveolar<br>meconium and<br>ceratine<br>lamella | edema: heart<br>failure <sup>2</sup>                                                 |
| <b>Liver</b>               | vacuolization<br>(lipid storage)                                               | vacuolization<br>(lipid storage),<br>cysts   | cysts                          | vacuolization<br>(glycogen<br>storage)                               | neonatal glycogen<br>and lipid storage <sup>3</sup><br>Cysts: fetal HCM <sup>4</sup> |
| <b>Kidney</b>              | cysts                                                                          | cysts                                        | cysts                          | No data                                                              | heart failure <sup>2</sup> ,<br>fetal HCM <sup>4</sup>                               |
| <b>lymph nodes</b>         | lymphadenitis                                                                  | lymphadenitis                                | No data                        | ulcerous<br>inflammation                                             | *                                                                                    |
| <b>Bone marrow</b>         | no abnormal<br>diagnosis                                                       | red                                          | red                            | red                                                                  | *                                                                                    |
| <b>Heart</b>               | No abnormal diagnosis                                                          |                                              |                                |                                                                      |                                                                                      |
| <b>Additional findings</b> | Abdominal effusion                                                             |                                              |                                |                                                                      | heart failure <sup>2</sup> ,<br>fetal HCM <sup>5</sup>                               |

\* Reaction to undefined immunologic stimulation, most probably not related to animals' death

\*\* It should be noted that nothing indicates to a toxic insult that may otherwise have caused the myositis in the neonatal animals.

**Table S2: Cardiac size\* of genome edited animals [mm]**

| <b>animal</b>     | <b>Body weight</b> | <b>Heart height</b> | <b>Heart width</b> | <b>Septum thickness</b> |
|-------------------|--------------------|---------------------|--------------------|-------------------------|
| <b>p5 (R723G)</b> | No data            | 40                  | 31                 | 8                       |
| <b>p6 (R723G)</b> | No data            | 41                  | 31                 | 8                       |
| <b>p7 (R723G)</b> | No data            | 39                  | 33                 | 8                       |
| <b>p8 (WT)</b>    | 1.5 kg             | 50                  | 44                 | 7                       |
| <b>p9 (WT)</b>    | 0.5 kg             | 34                  | 27                 | 7                       |

\*Heart height was measured from the cardiac apex to the aortic root. Heart width and septum thickness refer to the widest site for each heart.

**Table S3: Genes with variants in the genome edited animals**

|    | <b>SYMBOL/ID</b> | <b>Gene</b>        | <b>Modification</b> | <b>Function</b>                                                                                         |
|----|------------------|--------------------|---------------------|---------------------------------------------------------------------------------------------------------|
| 1  | SETSIP           | ENSSSCG00000005656 | base substitution   | nucleosome assembly                                                                                     |
| 2  | F1RWS0           | ENSSSCG00000005796 | base substitution   | olfactory receptor activity                                                                             |
| 3  | I3LFV8           | ENSSSCG00000024409 | base substitution   | olfactory receptor activity                                                                             |
| 4  | F1RWQ3           | ENSSSCG00000005817 | base substitution   | olfactory receptor activity                                                                             |
| 5  | I3LBT9           | ENSSSCG00000028938 | base substitution   | olfactory receptor activity                                                                             |
| 6  | F1RV62           | ENSSSCG00000005872 | base substitution   | olfactory receptor activity                                                                             |
| 7  | PPAG3            | ENSSSCG00000013096 | base substitution   | pregnancy-associated glycoprotein 3, aspartic proteinase expressed in trophectoderm                     |
| 8  | I3LJT8           | ENSSSCG00000028404 | base substitution   | olfactory receptor activity                                                                             |
| 9  | F1RH28           | ENSSSCG00000014530 | base substitution   | olfactory receptor activity                                                                             |
| 10 | F1S6T5           | ENSSSCG00000013412 | base substitution   | transcription co-repressor activity                                                                     |
| 11 | F1S6J0           | ENSSSCG00000023319 | base substitution   | olfactory receptor activity                                                                             |
| 12 | I3LWX0           | ENSSSCG00000029505 | base substitution   | olfactory receptor activity                                                                             |
| 13 | F1S9Z9           | ENSSSCG00000013842 | base substitution   | heme binding                                                                                            |
| 14 | I3L8I3           | ENSSSCG00000029101 | base substitution   | olfactory receptor activity                                                                             |
| 15 | F1SCB1           | ENSSSCG00000013809 | base substitution   | olfactory receptor activity                                                                             |
| 16 | I3LF13           | ENSSSCG00000024741 | base substitution   | no pathway information available, no ortholog assigned                                                  |
| 17 | SEMA6A           | ENSSSCG00000014224 | base substitution   | required for proper development of the thalamocortical projection                                       |
| 18 | PCDHA13          | ENSSSCG00000028030 | base substitution   | establishment and function of specific cell-cell connections in the brain                               |
| 19 | OR5D18           | ENSSSCG00000014458 | base substitution   | olfactory receptor family                                                                               |
| 20 | LOC100526160     | ENSSSCG00000024147 | base substitution   | olfactory receptor 4C46-like                                                                            |
| 21 | LOC100524490     | ENSSSCG00000023055 | base substitution   | olfactory receptor 2AE1-like                                                                            |
| 22 | MOSPD3           | ENSSSCG00000023255 | base substitution   | motile sperm domain containing 3                                                                        |
| 23 | HN1L             | ENSSSCG00000008019 | base substitution   | hematological and neurological expressed 1-like                                                         |
| 24 | TCF7L1           | ENSSSCG00000008241 | base substitution   | transcription factor 7 like 1                                                                           |
| 25 | -                | ENSSSCG00000008671 | base substitution   | The human ortholog family proteasome subunit beta type-5 cleaves peptides in an ATP/ubiquitin-dependent |

|    |                   |                    |                   |                                                                                                                                                            |
|----|-------------------|--------------------|-------------------|------------------------------------------------------------------------------------------------------------------------------------------------------------|
|    |                   |                    |                   | process in a non-lysosomal pathway                                                                                                                         |
| 26 | RCSD1             | ENSSSCG00000006307 | base substitution | may regulate the ability of F-actin-capping protein to remodel actin filament assembly (skeletal muscle contraction)                                       |
| 27 | OTUD7B            | ENSSSCG00000006663 | base substitution | deubiquitinase, dysfunction associated to cancer                                                                                                           |
| 28 | NACA              | ENSSSCG00000020830 | base substitution | Prevents inappropriate targeting of non-secretory polypeptides to the endoplasmic reticulum                                                                |
| 29 | HSBP1             | ENSSSCG00000000460 | base substitution | heat shock factor binding protein 1 interacts with the active trimeric state of HSF1 to negatively regulate HSF1 DNA-binding activity                      |
| 30 | STK38L (NDR2)     | ENSSSCG00000022288 | base substitution | serine/threonine kinase 38 like, cell cycle progression                                                                                                    |
| 31 | PABPC4            | ENSSSCG00000003660 | base substitution | poly(A) binding protein cytoplasmic 4, might be necessary for regulation of stability of labile mRNA species in activated T cells                          |
| 32 | TMP-CH242-74M17.2 | ENSSSCG00000001229 | base substitution | The human ortholog family proteasome subunit beta type-5 cleaves peptides in an ATP/ubiquitin-dependent process in a non-lysosomal pathway                 |
| 33 | LOC100153899      | ENSSSCG00000030371 | base substitution | serpin A3-8, involved in hemostasis                                                                                                                        |
| 34 | -                 | ENSSSCG00000030059 | base substitution | olfactory receptor                                                                                                                                         |
| 35 | LOC106504562      | ENSSSCG00000002624 | base substitution | ortholog to Glutathione S-transferase A3 is involved in cellular defense against toxic, carcinogenic, and pharmacologically active electrophilic compounds |
| 36 | -                 | ENSSSCG00000014894 | base substitution | human ortholog (Teneurin 4) is involved in neural development                                                                                              |
| 37 | USP2              | ENSSSCG00000015120 | base substitution | deubiquitinates polyubiquitinated target                                                                                                                   |

|    |          |                    |                   |                                                                                                                                                                                                                                                                                                                 |
|----|----------|--------------------|-------------------|-----------------------------------------------------------------------------------------------------------------------------------------------------------------------------------------------------------------------------------------------------------------------------------------------------------------|
|    |          |                    |                   | proteins such as MDM2, MDM4 and CCND1, influence on circadian rhythm                                                                                                                                                                                                                                            |
| 38 | RNF2     | ENSSSCG00000015568 | base substitution | suppress the activity of, transcription factor CP2 (TFCP2/CP2). Involved in in cell proliferation in early development.                                                                                                                                                                                         |
| 39 | SOX9     | ENSSSCG00000017251 | base substitution | SRY (sex determining region Y)-box 9                                                                                                                                                                                                                                                                            |
| 40 | VPS26A   | ENSSSCG00000010250 | base substitution | retromer complex component A                                                                                                                                                                                                                                                                                    |
| 41 | C10orf76 | ENSSSCG00000010571 | base substitution | interacts with SEPT3 and 9, unknown function, also for human orthologue                                                                                                                                                                                                                                         |
| 42 | CCNYL1   | ENSSSCG00000024696 | base substitution | spermatogenesis and sperm motility                                                                                                                                                                                                                                                                              |
| 43 | IKZF2    | ENSSSCG00000016164 | base substitution | negative regulation of transcription from RNA polymerase II promoter                                                                                                                                                                                                                                            |
| 44 | RICTOR   | ENSSSCG00000016853 | base substitution | Subunit of mTORC2, which regulates cell growth and survival in response to hormonal signals. Plays an essential role in embryonic growth and development.                                                                                                                                                       |
| 45 | F1SBM9   | ENSSSCG00000007038 | base substitution | uncharacterized protein, orthologous to LEM-domain family (LEM-domain proteins are involved in diverse cellular processes including replication and cell cycle control, chromatin organization and nuclear assembly, the regulation of gene expression and signaling pathways, as well as retroviral infection) |
| 46 | I3LD58   | ENSSSCG00000024507 | base substitution | uncharacterized protein, orthologous to LEM-domain family (LEM-domain proteins are involved in diverse cellular processes including replication and cell cycle control, chromatin organization and nuclear assembly, the                                                                                        |

|    |              |                    |                   |                                                                                                                                                                                                                                                        |
|----|--------------|--------------------|-------------------|--------------------------------------------------------------------------------------------------------------------------------------------------------------------------------------------------------------------------------------------------------|
|    |              |                    |                   | regulation of gene expression and signaling pathways, as well as retroviral infection)                                                                                                                                                                 |
| 47 | I3L5Z7       | ENSSSCG00000022771 | base substitution | human orthologue GPR107 is involved in Golgi-to-ER retrograde transport                                                                                                                                                                                |
| 48 | PNKD         | ENSSSCG00000029329 | base substitution | Mutations in this gene have been associated with the movement disorder paroxysmal non-kinesigenic dyskinesia                                                                                                                                           |
| 49 | DGKQ         | ENSSSCG00000027286 | base substitution | mediates the regeneration of phosphatidylinositol (PI) from diacylglycerol in the PI-cycle during cell signal transduction                                                                                                                             |
| 50 | CYP19A1      | ENSSSCG00000030168 | indel             | cytochrome P450 19A1, involved in sperm fertility regulation                                                                                                                                                                                           |
| 51 | -            | ENSSSCG00000026788 | indel             | olfactory receptor                                                                                                                                                                                                                                     |
| 52 | FZD7         | ENSSSCG00000016111 | indel             | frizzled class receptro 7, receptors for Wnt signaling proteins                                                                                                                                                                                        |
| 53 | CD44         | ENSSSCG00000013297 | indel             | involved in oocyte maturation                                                                                                                                                                                                                          |
| 54 | PTPRS        | ENSSSCG00000028612 | indel             | Receptor-type tyrosine-protein phosphatase S, human and mouse orthologs suggested to be involved in cell-cell interaction, primary axonogenesis, and axon guidance during embryogenesis and implicated in the molecular control of adult nerve repair. |
| 55 | -            | ENSSSCG00000014380 | indel             | human ortholog PCDHB15 is involved in ectoderm development                                                                                                                                                                                             |
| 56 | LOC100519082 | ENSSSCG00000014565 | indel             | interferon-induced transmembrane protein 1, involved in B cell receptor signalling pathway                                                                                                                                                             |

|    |              |                    |       |                                                                                                                                                                                                                                                              |
|----|--------------|--------------------|-------|--------------------------------------------------------------------------------------------------------------------------------------------------------------------------------------------------------------------------------------------------------------|
| 57 | LOC100627004 | ENSSSCG00000028736 | indel | interferon-induced transmembrane protein 1-like                                                                                                                                                                                                              |
| 58 | LY6H         | ENSSSCG00000006961 | indel | lymphocyte antigen 6 family member H, posttranscriptional modification if GPI-anchored proteins                                                                                                                                                              |
| 59 | CA8          | ENSSSCG00000006233 | indel | carbonic anhydrase 8, nitrogen metabolism                                                                                                                                                                                                                    |
| 60 | SYMPK        | ENSSSCG00000003093 | indel | symplekin functions in the regulation of polyadenylation and promotes gene expression                                                                                                                                                                        |
| 61 | SLC35D1      | ENSSSCG00000003802 | indel | solute carrier family 35 member D1, UDP-N-acetylglucosamine/UDP-glucose/GDP-mannose transporter may participate in glucuronidation and/or chondroitin sulfate biosynthesis. Mutations in this gene are associated with Schneckenbecken dysplasia* (symptoms: |
| 62 | -            | ENSSSCG00000029865 | indel | assigned to family of metabotropic glutamate receptor 5 that may be involved in the regulation of neural network activity and synaptic plasticity                                                                                                            |
| 63 | OAF          | ENSSSCG00000026647 | indel | out at first homolog, no function assigned, Diseases associated with OAF include Chronic Maxillary Sinusitis                                                                                                                                                 |

\* Schneckenbecken dysplasia is a neonatally lethal chondroplasia. Patients show “short, broad long-bones with dumbbell-like appearance, flat and hypoplastic vertebral bodies, short and wide fibula, and precocious ossification of the tarsus.” (Borochowitz et al., 1986). Note that the genome edited animals show no signs of dysplasia or any malformation of the bones. Heterozygous knock out mice show no phenotype, whereas homozygous knock-outs die neonatally (Hiraoka et al., 2007).



**Table S4: Predicted off-target sites of the TALEN pair used for genome editing**

|                  | <b>Chromosome</b> | <b>Start</b> | <b>End</b> | <b>Mismatch</b> |
|------------------|-------------------|--------------|------------|-----------------|
| <b>Target 1*</b> | chr7              | 81078817     | 81078866   | 2               |
| <b>Target 2</b>  | chr5              | 72122334     | 72122395   | 5               |
| <b>Target 3</b>  | chr10             | 25916449     | 25916509   | 7               |
| <b>Target 4</b>  | chr9              | 1,26E+08     | 1,26E+08   | 7               |
| <b>Target 5</b>  | chr15             | 1,27E+08     | 1,27E+08   | 8               |
| <b>Target 6</b>  | chr3              | 19333272     | 19333325   | 8               |
| <b>Target 7</b>  | chr13             | 58049063     | 58049116   | 8               |
| <b>Target 8</b>  | chr13             | 57902270     | 57902323   | 8               |
| <b>Target 9</b>  | chr11             | 80975743     | 80975802   | 7               |
| <b>Target 10</b> | chr14             | 1,41E+08     | 1,41E+08   | 8               |
| <b>Target 11</b> | chr3              | 1,36E+08     | 1,36E+08   | 8               |
| <b>Target 12</b> | chr1              | 2,49E+08     | 2,49E+08   | 8               |
| <b>Target 13</b> | chr1              | 2,49E+08     | 2,49E+08   | 8               |
| <b>Target 14</b> | chr5              | 1,1E+08      | 1,1E+08    | 8               |
| <b>Target 15</b> | chr5              | 56089986     | 56090046   | 8               |
| <b>Target 16</b> | chr14             | 1,32E+08     | 1,32E+08   | 8               |
| <b>Target 17</b> | chr15             | 3226481      | 3226539    | 7               |
| <b>Target 18</b> | chr12             | 21923763     | 21923824   | 8               |
| <b>Target 19</b> | chr7              | 62624663     | 62624712   | 6               |
| <b>Target 20</b> | chr1              | 1,57E+08     | 1,57E+08   | 8               |
| <b>Target 21</b> | chr5              | 66377844     | 66377899   | 8               |
| <b>Target 22</b> | chr8              | 1,42E+08     | 1,42E+08   | 8               |
| <b>Target 23</b> | chr15             | 65341152     | 65341206   | 9               |
| <b>Target 24</b> | chr15             | 65251904     | 65251958   | 9               |
| <b>Target 25</b> | chrX              | 92541175     | 92541232   | 8               |
| <b>Target 26</b> | chr9              | 1,14E+08     | 1,14E+08   | 9               |
| <b>Target 27</b> | chr3              | 37191323     | 37191383   | 8               |
| <b>Target 28</b> | chr15             | 16971212     | 16971272   | 8               |
| <b>Target 29</b> | chr1              | 1,08E+08     | 1,08E+08   | 7               |
| <b>Target 30</b> | chr3              | 1E+08        | 1E+08      | 9               |
| <b>Target 31</b> | chr15             | 1,35E+08     | 1,35E+08   | 6               |
| <b>Target 32</b> | chr6              | 71093917     | 71093973   | 7               |
| <b>Target 33</b> | chr10             | 49559347     | 49559407   | 9               |
| <b>Target 34</b> | chr10             | 34092117     | 34092170   | 9               |
| <b>Target 35</b> | chr16             | 58052767     | 58052818   | 9               |
| <b>Target 36</b> | chr3              | 1,09E+08     | 1,09E+08   | 8               |
| <b>Target 37</b> | chr7              | 15706117     | 15706167   | 8               |
| <b>Target 38</b> | chr3              | 1,29E+08     | 1,29E+08   | 8               |
| <b>Target 39</b> | chr8              | 73656431     | 73656483   | 9               |
| <b>Target 40</b> | chr10             | 12555269     | 12555317   | 8               |
| <b>Target 41</b> | chr9              | 76471254     | 76471304   | 9               |
| <b>Target 42</b> | chr13             | 1,22E+08     | 1,22E+08   | 8               |
| <b>Target 43</b> | chr1              | 87380802     | 87380854   | 7               |
| <b>Target 44</b> | chr2              | 87468643     | 87468693   | 8               |
| <b>Target 45</b> | chr13             | 1,41E+08     | 1,41E+08   | 8               |

|                  |       |          |          |    |
|------------------|-------|----------|----------|----|
| <b>Target 46</b> | chr10 | 27801214 | 27801264 | 8  |
| <b>Target 47</b> | chr1  | 71888738 | 71888788 | 8  |
| <b>Target 48</b> | chr13 | 2,18E+08 | 2,18E+08 | 9  |
| <b>Target 49</b> | chr8  | 81264267 | 81264326 | 9  |
| <b>Target 50</b> | chr15 | 11393419 | 11393478 | 8  |
| <b>Target 51</b> | chr6  | 13053122 | 13053175 | 9  |
| <b>Target 52</b> | chr17 | 16191859 | 16191910 | 9  |
| <b>Target 53</b> | chr17 | 14405632 | 14405683 | 9  |
| <b>Target 54</b> | chr7  | 1,31E+08 | 1,31E+08 | 8  |
| <b>Target 55</b> | chr13 | 57588549 | 57588601 | 8  |
| <b>Target 56</b> | chr3  | 16315905 | 16315965 | 6  |
| <b>Target 57</b> | chr3  | 18579492 | 18579545 | 7  |
| <b>Target 58</b> | chr3  | 27152758 | 27152815 | 8  |
| <b>Target 59</b> | chrX  | 1,25E+08 | 1,25E+08 | 10 |
| <b>Target 60</b> | chr14 | 61902657 | 61902713 | 8  |
| <b>Target 61</b> | chr8  | 4835019  | 4835068  | 9  |
| <b>Target 62</b> | chr1  | 50320654 | 50320706 | 7  |
| <b>Target 63</b> | chr8  | 1,05E+08 | 1,05E+08 | 9  |
| <b>Target 64</b> | chr2  | 46988756 | 46988805 | 10 |
| <b>Target 65</b> | chr14 | 98213389 | 98213447 | 9  |
| <b>Target 66</b> | chr15 | 1,5E+08  | 1,5E+08  | 9  |
| <b>Target 67</b> | chr15 | 1,48E+08 | 1,48E+08 | 9  |
| <b>Target 68</b> | chr2  | 1,61E+08 | 1,61E+08 | 9  |
| <b>Target 69</b> | chrX  | 88606848 | 88606907 | 9  |
| <b>Target 70</b> | chr2  | 1,49E+08 | 1,49E+08 | 7  |
| <b>Target 71</b> | chr9  | 55092038 | 55092089 | 8  |
| <b>Target 72</b> | chr2  | 1,42E+08 | 1,42E+08 | 8  |
| <b>Target 73</b> | chr7  | 1,34E+08 | 1,34E+08 | 9  |
| <b>Target 74</b> | chr3  | 1,15E+08 | 1,15E+08 | 7  |
| <b>Target 75</b> | chr11 | 72797123 | 72797183 | 9  |
| <b>Target 76</b> | chr3  | 37357920 | 37357971 | 10 |
| <b>Target 77</b> | chr10 | 47204006 | 47204059 | 9  |
| <b>Target 78</b> | chr14 | 1,01E+08 | 1,01E+08 | 9  |
| <b>Target 79</b> | chr3  | 90916440 | 90916499 | 9  |
| <b>Target 80</b> | chr4  | 7098167  | 7098228  | 9  |
| <b>Target 81</b> | chr5  | 48586015 | 48586074 | 9  |
| <b>Target 82</b> | chr7  | 1,07E+08 | 1,07E+08 | 9  |
| <b>Target 83</b> | chr8  | 88109952 | 88110011 | 9  |
| <b>Target 84</b> | chr9  | 2962426  | 2962486  | 9  |
| <b>Target 85</b> | chr17 | 19192208 | 19192268 | 9  |
| <b>Target 86</b> | chr7  | 1,03E+08 | 1,03E+08 | 7  |
| <b>Target 87</b> | chr8  | 31705484 | 31705544 | 9  |
| <b>Target 88</b> | chr9  | 1,05E+08 | 1,05E+08 | 9  |
| <b>Target 89</b> | chr1  | 1,04E+08 | 1,04E+08 | 10 |
| <b>Target 90</b> | chr11 | 32668464 | 32668518 | 9  |
| <b>Target 91</b> | chr1  | 1,12E+08 | 1,12E+08 | 8  |
| <b>Target 92</b> | chr6  | 1,52E+08 | 1,52E+08 | 9  |

|                   |       |          |          |    |
|-------------------|-------|----------|----------|----|
| <b>Target 93</b>  | chr4  | 84313677 | 84313729 | 9  |
| <b>Target 94</b>  | chr14 | 40790693 | 40790744 | 7  |
| <b>Target 95</b>  | chr5  | 20884737 | 20884797 | 8  |
| <b>Target 96</b>  | chr18 | 18786847 | 18786901 | 7  |
| <b>Target 97</b>  | chr13 | 49530564 | 49530623 | 8  |
| <b>Target 98</b>  | chr17 | 45670405 | 45670454 | 10 |
| <b>Target 99</b>  | chr16 | 15047956 | 15048016 | 8  |
| <b>Target 100</b> | chr15 | 6665713  | 6665771  | 9  |

\* Target 1 is the *MYH7* gene, the two mismatches represent a CA-insertion, that is not included in the reference sequence NC\_010449 but was sequence verified in the German Landrace pigs (see also Fig. S1)

**Table S5: PCR- and sequencing primers**

| PCR                                                              | Forward primer                            | Reverse primer                          | Amplicon length [bp] | Annealing temperature [°C] |
|------------------------------------------------------------------|-------------------------------------------|-----------------------------------------|----------------------|----------------------------|
| Donor DNA                                                        | Intron 18 for<br>AGGTCACCTCCTGATCTCC      | Intron 20 rev<br>TCCCAGTAAGGGCTAGC      | 1008                 | 62°C                       |
| mutagenesis                                                      | 723 mut sense<br>TTCCTCCCAGGTATGGCA       | 723 mut as<br>AGGGTTCAGGATGCCATA        |                      | 60°C                       |
| Mutation screening                                               | Ssc719for<br>GTGCTGGAGGGCATCCGC           | Ssc719rev<br>CTTCTCTGCTCCTTTCCTG        | 259                  | 62°C                       |
| <b>Quantification of MYH7 allele expression</b>                  |                                           |                                         |                      |                            |
| cDNA                                                             |                                           | ATGCGGGTGATGATGCGG                      |                      |                            |
| qPCR                                                             | ssc723mRNA-for_Styl<br>TCTATGGGGACTTCCGGC | ssc719Quant_rev<br>CAGGGGTTTGATCCTTGAAC | 377                  | 68°C                       |
| <b>Relative quantification of MYH7 per GAPDH mRNA expression</b> |                                           |                                         |                      |                            |
| MYH7                                                             | Ssc453for<br>TGGCCAAGGCCGTGTATG           | Ssc453rev<br>GAAGATCTCAAAGCCAGCC        | 125                  | 60°C                       |
| GAPDH <sup>6</sup>                                               | AACTCACTCTTCTACCTT                        | CAAATTCATTGTCGTACCA                     |                      | 60°C                       |
| <b>Bisulfite specific PCR and Sequencing</b>                     |                                           |                                         |                      |                            |
|                                                                  | TAGGTTTATTTGGTGGGAG                       | AACTCCAAAACCAATTCTC                     | 302                  | 56°C                       |

## Supplementary figures:

```

Exon (20) R723G
TCCCCAGGTA TCGCATCCTG AACCCCTGCGG CCATCCCCGA GGGCCAGTTC ATTGACAGCA GGAAAGGAGC AGAGAAGCTG
.....
.....
.....
*****

(Exon (20))
CTGGGCTCCC TGGACATTGA CCACAACCAG TA--AGTTTG GCCACACCAA GGTGAGGAAA GGABBPPEXPA NDNST-----
.....
.....
.....
*****

-----
TAGGAAGACC TCTTTTGTCC TTTGGCTCCT CACCTCATGG CTCCTTCCCT TTT.....
TAGGAAGACC TCTTTTGTCC TTTGGCTCCT CACCTCATGG CTCCTTCCCT TTT.....
TAGGAAGACC TCTTTTGTCC TTTGGCTCCT CACCTCATGG CTCCTTCCCT TTT.....
TAGGAAGACC TCTTTTGTCC TTTGGCTCCT CACCTCATGG TCYTTCCCT TTT.....
*****

```

**Fig. S1: Sequencing of gap in porcine *MYH7* reference sequence NC\_010449.** The reference sequence of the *MYH7* gene (NC\_010449 alignment sus scrofa 10.2) contains a gap at position 81078606 of estimated 100 bp (row 1). We have sequenced this region in four German Landrace pigs (rows 2-5) by Sanger sequencing of PCR products generated by primers flanking the region. We determined a 72 bp sequence. In addition, we found a CA-insertion 26 bp downstream of the gap. However, these nucleotides are present in the cDNA NM\_000257.2, therefore we assume this is a common sequence of the *sus scrofa* species.

**A**

**Culture H4 (*BsII* positive)**

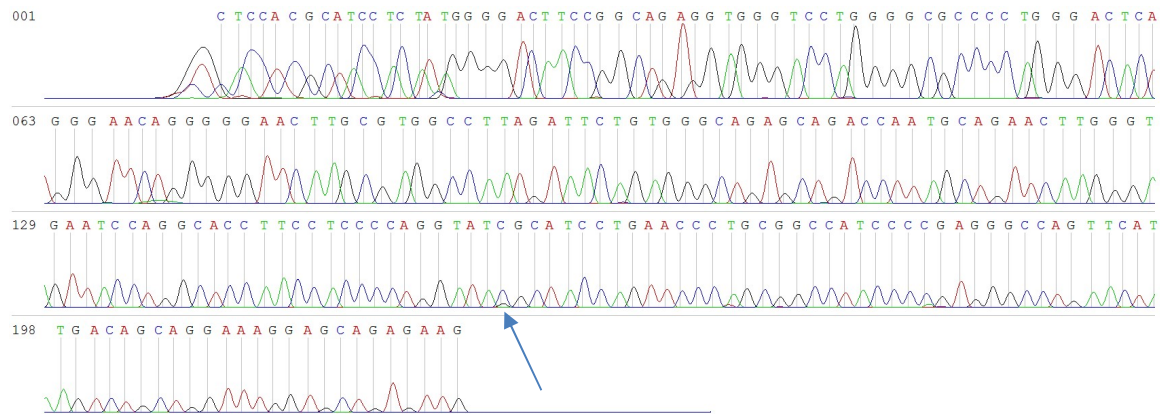

**Culture F4 (*BsII* negative)**

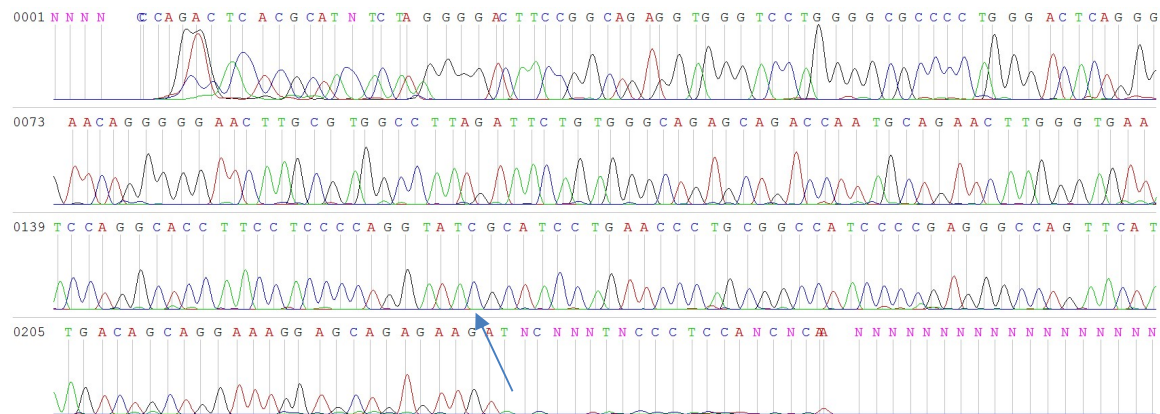

**Figure S2: Sanger Sequencing of mutation locus in genome edited fibroblast cultures** Porcine fetal fibroblasts were transfected with the TALEN vectors and the DonorDNA encoding vector, separated in subcultures at 10,000 cells per well and cultivated for 4 passages. An aliquot of the cells was lysed, the mutation locus in the *MYH7* gene was PCR amplified and subjected to mutation specific restriction analysis. The PCR product from the restriction analysis-positive culture H4 was analyzed by Sanger sequencing using the PCR-forward primer. Successful genome editing was indicated by the base substitution C>G indicated by the arrow. Two additional polymorphisms can be determined downstream of the mutation locus, however, these are also present in the wildtype fibroblasts (F4).

### Clone 516/F2

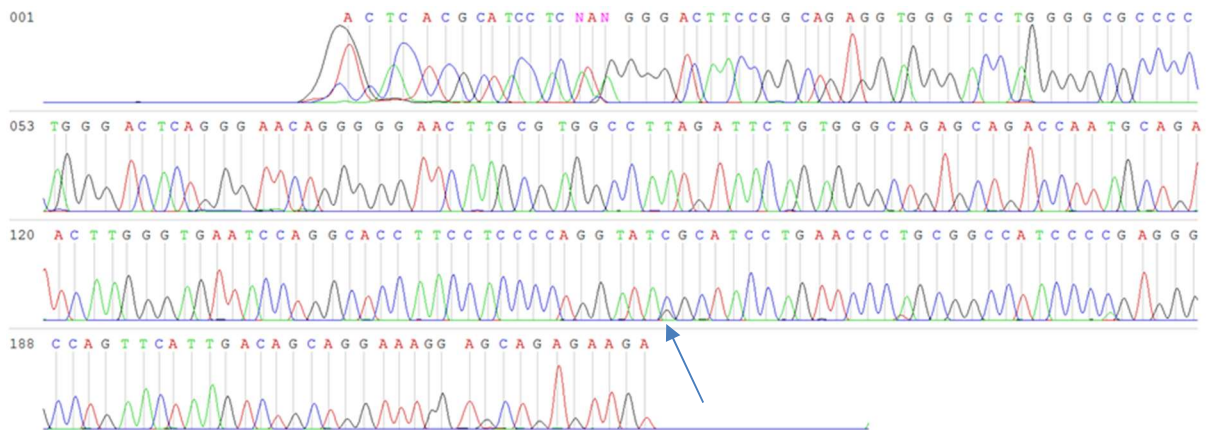

### Clone 516/F3

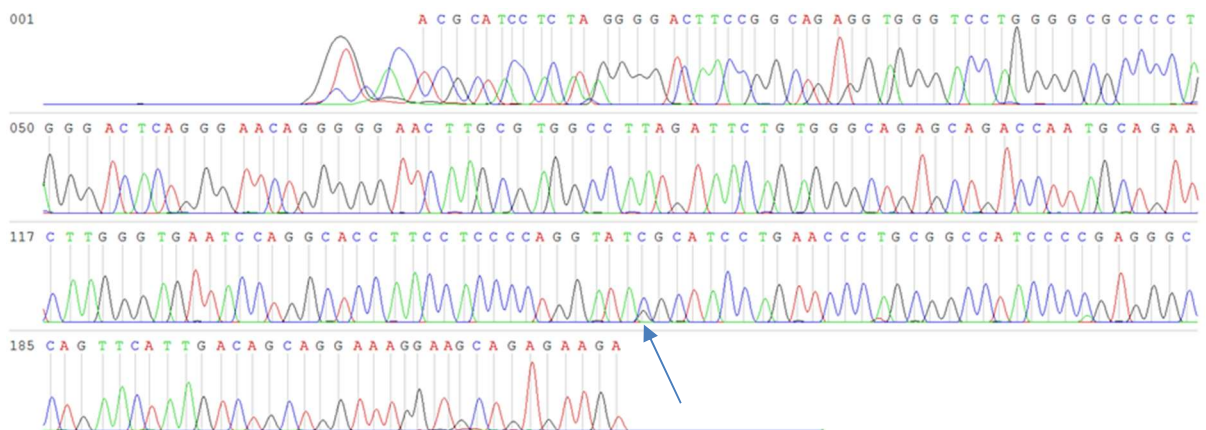

### Genome edited pigs:

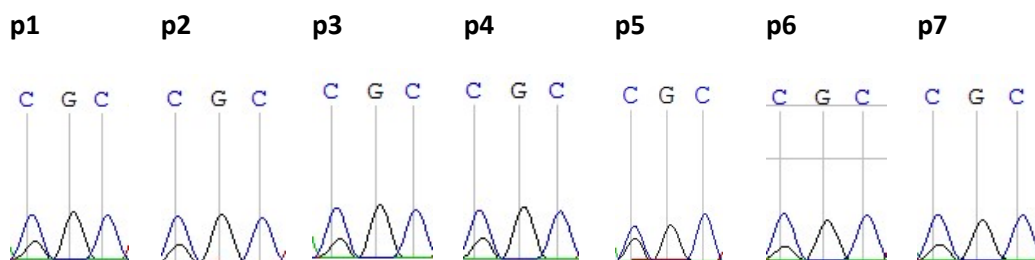

**Figure S3: Sanger Sequencing of mutation locus in genome edited clones** Culture H4 was used for SCNT, oocytes were transferred to two sows, fibroblasts were isolated from six fetuses and analyzed for the mutation. The two restriction analysis-positive clones 516/F2 and 516/F3 were validated by Sanger sequencing. The position of base substitution is indicated by an arrow. In addition, genomic DNA from cardiac tissue of seven genome edited piglets (p1-p7) was subjected to *MYH7*-specific PCR and codon 723 was analyzed by Sanger sequencing to determine the mono-allelic C>G base substitution.

**A**

**p1**

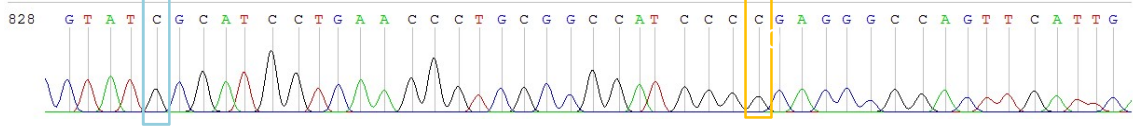

**p2**

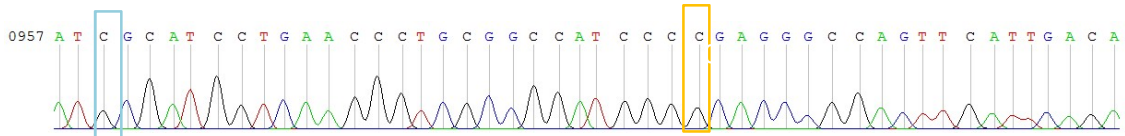

**p3**

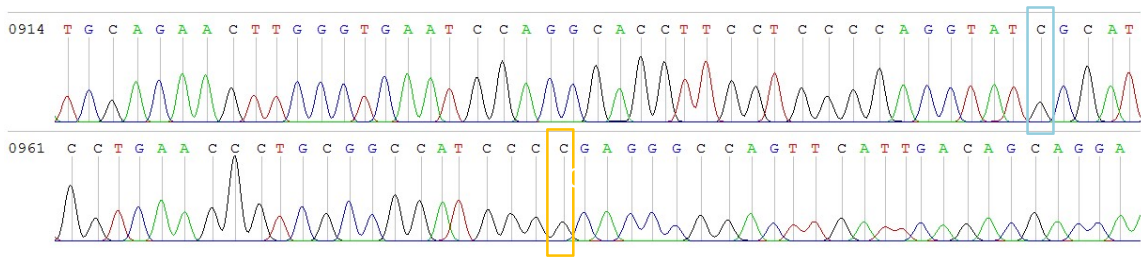

**p4**

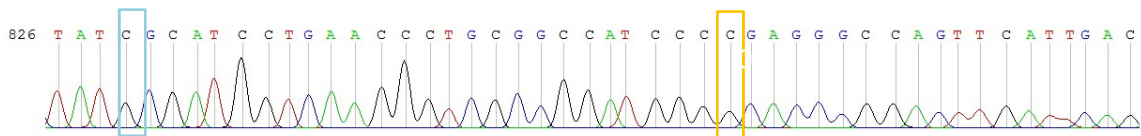

**p5**

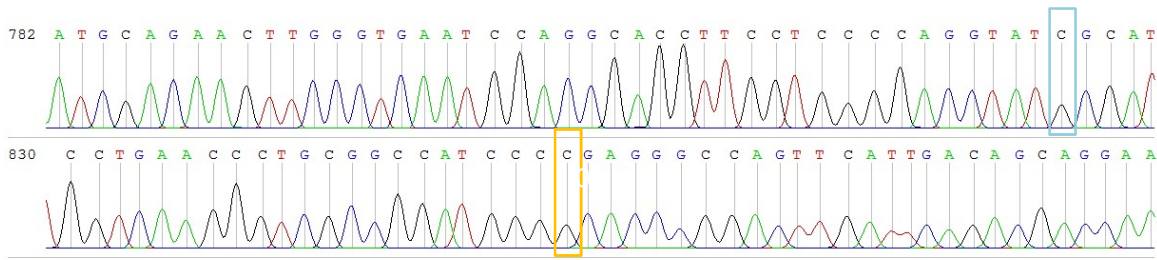

**p6**

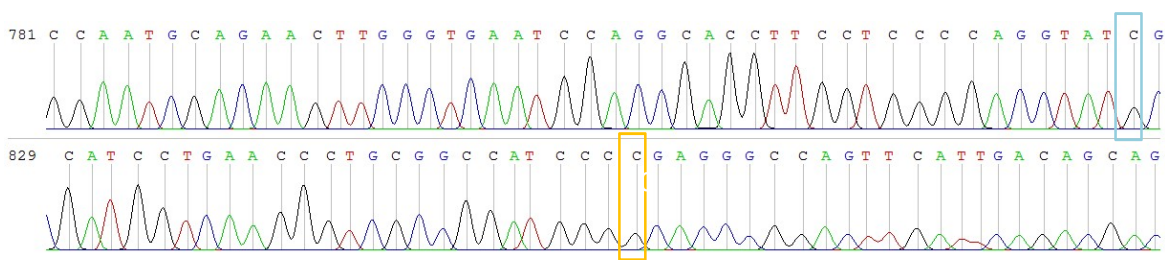

**p7**



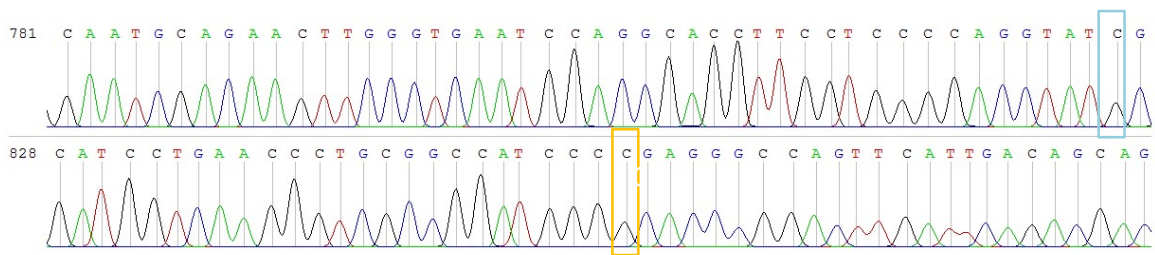

p1, both alleles

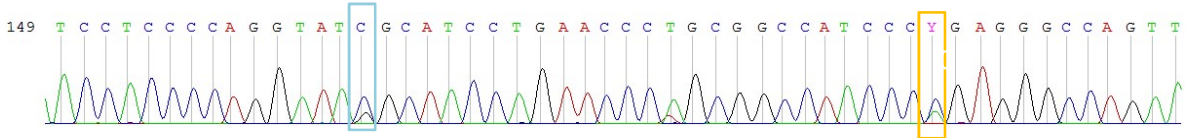

**B**

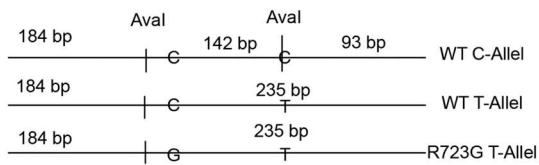

**C**

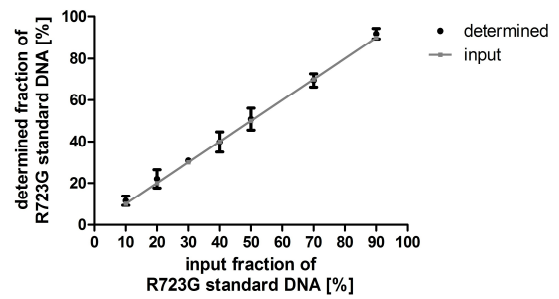

**D**

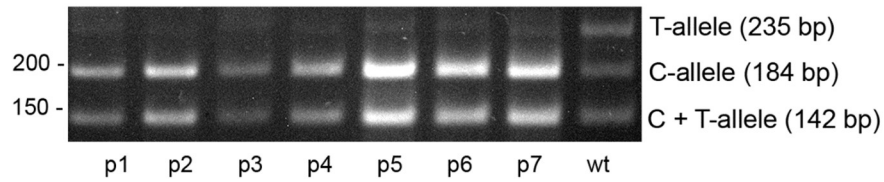

**E**

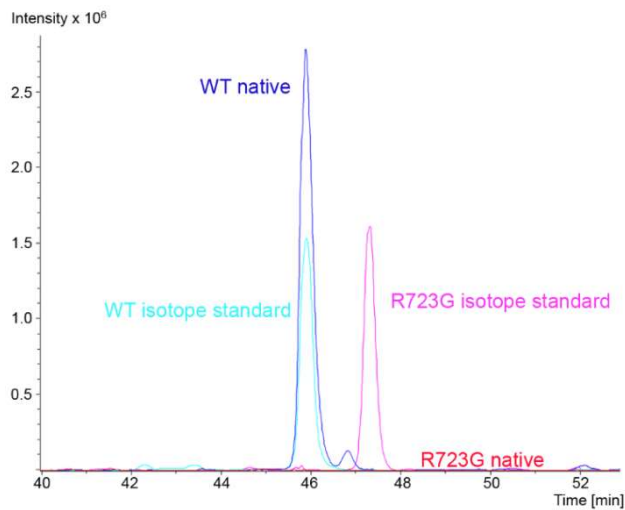

**Figure S4**

#### Figure S4: Relative quantification of *MYH7* alleles and $\beta$ -MyHC isoforms

**(A)** Using the primer pair Intron 18 for and Exon 20 rev (Table S1) the c.2193C-allele was exclusively amplified (compare: p1 (top panel) and p1 both alleles (lowest panel)). Thus this allele was PCR-amplified from genomic DNA of the seven genome edited piglets. PCR-products were subjected to Sanger sequencing. The nucleotide c.2193 is indicated by a yellow box, the nucleotide c.2167 (mutation site) by a blue box. **(B)** Schematic of restriction analysis for the relative quantification of the c.2193 C and T alleles. In the wildtype animals, both alleles encode for the C at position c.2167 (codon 723), however, upon *AvaI* restriction analysis both T- and C-allele can be discriminated. The genome edited animals encode for the wildtype C at position c.2167 on the C-allele and for the mutated G at position c.2167 on the T-allele. *AvaI* restriction results in a common 184 bp fragment for both alleles. The c.2193 C-allele generates a 142 bp fragment and the c.2193 T-allele (R723G allele in the genome edited animals) generates a 235 bp fragment. **(C)** Defined ratios of standard plasmids for each allele were subjected to PCR and subsequent allele specific restriction analysis<sup>7</sup>. The restriction fragments were separated by agarose gel-electrophoresis and quantified densitometrically. The resulting integrated optical density (IOD) of each band was normalized to its length (bp). The respective fraction of each mixture was determined as the ratio of IOD/bp of each standard plasmid. **(D)** RT-PCR and subsequent *AvaI*-restriction was performed on RNA extracted from left ventricular/septum tissue of the seven genome edited animals and two natural breeding wildtype controls. A representative agarose gel analysis is shown. Note that even though the T-allele (R723G) specific band of 235 bp is substantially weaker in comparison to the C-allele in the genome edited animals, it is visible in each animal, indicating a biallelic expression of the *MYH7* gene. **(E)** Representative mass spectrometric quantification of WT and R723G  $\beta$ -MyHC protein as described previously<sup>8</sup>. Stable-isotope labelled  $\beta$ -MyHC peptides with mutation R723G and the corresponding wild-type peptide pair were spiked in equimolar ratios to myosin extracts from the genome edited animals and subjected to Lys-C treatment. NanoLC-ESI-MS separation was performed. Traces represent the ion signals of the 5-fold charged peptides. Isotope labelled synthetic mutant (magenta) and wild-type (turquoise) peptides, and ion traces of native wild-type (blue) peptides were detected, whereas the signal for the native mutant peptide (red) was below the detection limit.

|          | MYH7                | GAPDH               |
|----------|---------------------|---------------------|
| Slope    | $-3.333 \pm 0.2026$ | $-3.230 \pm 0.2035$ |
| efficacy | 1,00                | 1,04                |

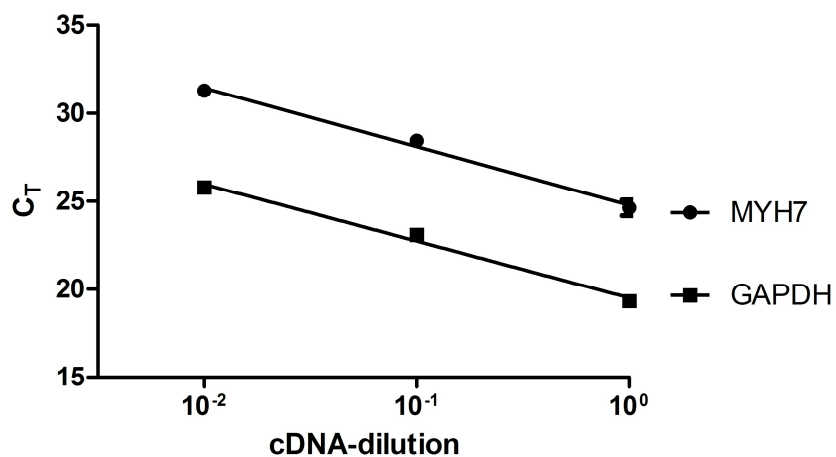

**Figure S5. Relative quantification of *MYH7* and *GAPDH* mRNA.** Total RNA was extracted from porcine cardiac tissue and mRNA was reverse transcribed using random hexamer primers. Dilutions of these cDNAs were subjected to real-time PCR analysis of *MYH7* and *GAPDH* mRNA expression. Efficacy of each primer set was calculated from the slope.

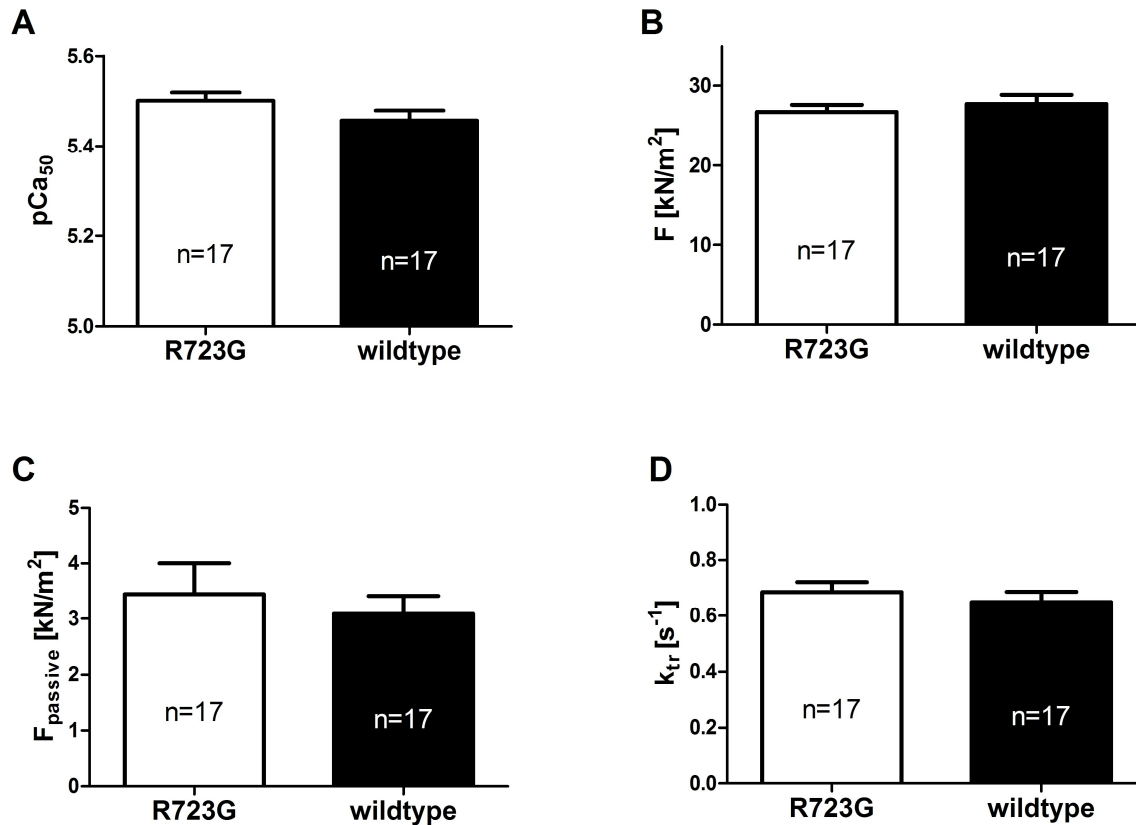

**Figure S6: Functional analyses of single cardiomyocytes of the genome edited animals**

**Force measurements in cardiomyocytes** Force measurements on single, mechanically isolated cardiomyocytes were performed as described previously<sup>9</sup>. In brief, single cardiomyocytes were isolated from left ventricular wall and septum of three genome edited animals (p5, p6, p7) and two age- and sex-matched controls (p8 and p9). Chemically permeabilized cardiomyocytes were attached to a motor and force transducer and incubated with protein kinase A (PKA) to adjust PKA-dependent phosphorylation levels. The cardiomyocytes were subjected to different calcium concentrations and force development under isometric conditions and the rate constant of force redevelopment after a quick release and restretch of the cardiomyocytes to isometric length ( $k_{tr}$ ) were determined. The corresponding calcium concentration (given as pCa) at half maximum force ( $pCa_{50}$ ) (A), maximum isometric force (B) and passive force per cross-sectional area (C), respectively, and the rate constant of force redevelopment (D) were determined for the genome edited and the wildtype controls. Mean and SEM of 17 single cardiomyocytes for each group are depicted.

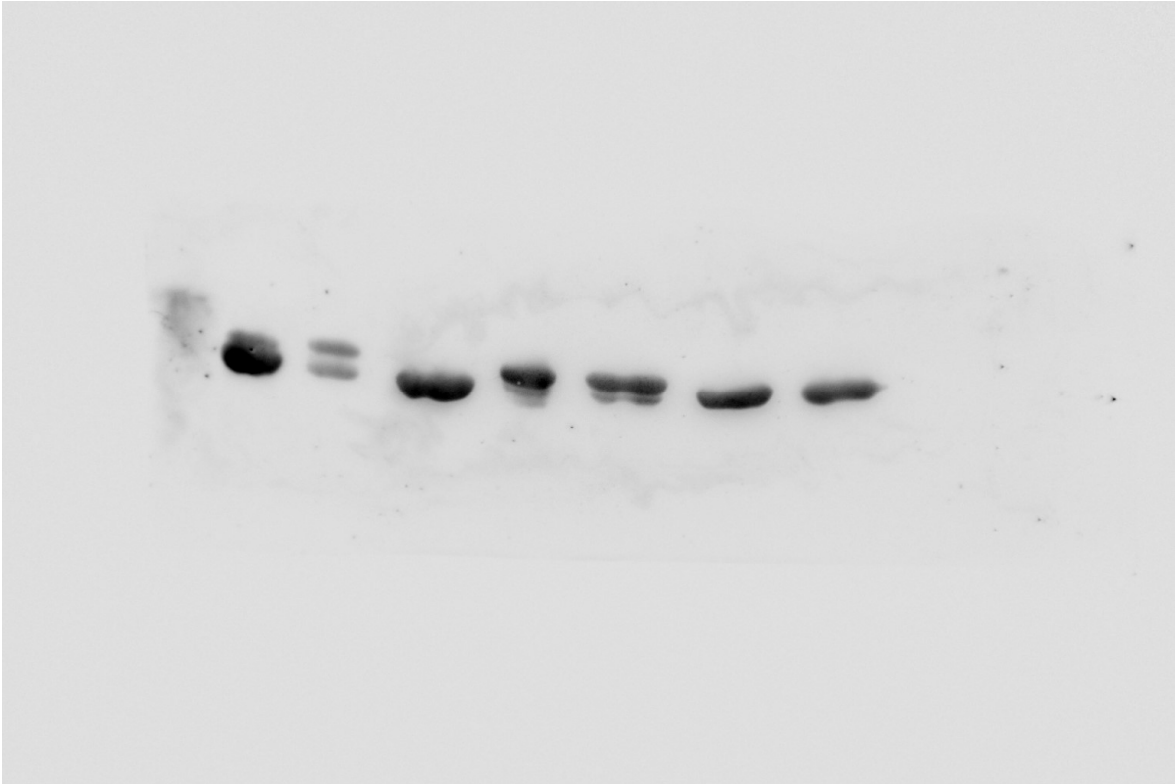

Figure S7: Full length blot of Figure 3D

## References

1. Fananapazir, L., Dalakas, M. C., Cyran, F., Cohn, G. & Epstein, N. D. Missense mutations in the beta-myosin heavy-chain gene cause central core disease in hypertrophic cardiomyopathy. *Proc Natl Acad Sci U S A*. **90**, 3993-7 (1993).
2. Khosa, F. et al. Prevalence of non-cardiac pathology on clinical transthoracic echocardiography. *J Am Soc Echocardiogr*. **25**, 553-7 (2012).
3. Holub, A., Padalikova, D. & Filka, J. Glycogen in liver, heart and skeletal muscle of baby pigs in the early postnatal period. *Veterinary Medicine*. **6**, 201-208 (1961).
4. Lekanne Deprez, R. H. et al. Two cases of severe neonatal hypertrophic cardiomyopathy caused by compound heterozygous mutations in the MYBPC3 gene. *J Med Genet*. **43**, 829-32 (2006).
5. Weber, R. et al. Spectrum and outcome of primary cardiomyopathies diagnosed during fetal life. *JACC Heart Fail*. **2**, 403-11 (2014).
6. Nygard, A. B., Jorgensen, C. B., Cirera, S. & Fredholm, M. Selection of reference genes for gene expression studies in pig tissues using SYBR green qPCR. *BMC Mol Biol*. **8**, 67 (2007).
7. Tripathi, S. et al. Unequal allelic expression of wild-type and mutated beta-myosin in familial hypertrophic cardiomyopathy. *Basic Res Cardiol*. **106**, 1041-55 (2011).
8. Becker, E., Navarro-Lopez, F., Francino, A., Brenner, B. & Kraft, T. Quantification of mutant versus wild-type myosin in human muscle biopsies using nano-LC/ESI-MS. *Anal Chem*. **79**, 9531-8 (2007).
9. Kraft, T. et al. Familial hypertrophic cardiomyopathy: functional effects of myosin mutation R723G in cardiomyocytes. *J Mol Cell Cardiol*. **57**, 13-22 (2013).
